# Supplementary material for: Association between fluoroquinolone resistance and MRSA genotype in Alexandria, Egypt
Source: PubMed Central journal article supplement (PMC7896087; doi:10.1038/s41598-021-83578-2), 2021-02-19
Supplement: 41598_2021_83578_MOESM1_ESM.pdf [file 41598_2021_83578_MOESM1_ESM.pdf]

**Title:** Association between fluoroquinolone resistance and MRSA genotype in Alexandria, Egypt.

**Author names:** Mustafa Alseqely, Mae Newton-Foot, Amal Khalil, Mostafa El-Nakeeb, Andrew Whitelaw, Alaa Abouelfetouh\*

Supplementary Table S1: Detailed characteristics of 72 methicillin resistant *Staphylococcus aureus* isolates obtained from Alexandria Main University Hospital.

| Isolate number | Patient's gender | Patient's age (Years) | Unit      | Clinical specimen | Type pf infection | <i>spa</i> type | SCC <i>mec</i> type | MLST   |
|----------------|------------------|-----------------------|-----------|-------------------|-------------------|-----------------|---------------------|--------|
| 3              | Female           | 46                    | ICU       | BAL               | HA                | t037            | III                 | ST-241 |
| 4              | Male             | 32                    | Inpatient | Pus               | HA                | t037            | III                 | ND     |
| 10             | Male             | 3                     | Inpatient | Pus               | HA                | t037            | III                 | ND     |
| 13             | Female           | 50                    | ICU       | BAL               | HA                | t037            | III                 | ND     |
| 14             | Male             | 19                    | Inpatient | Pus               | HA                | t037            | III                 | ND     |
| 22             | Female           | 40                    | Inpatient | Pus               | HA                | t037            | III                 | ND     |
| 23             | Male             | 19                    | Inpatient | Pus               | HA                | t037            | III                 | ND     |
| 27             | Female           | 1                     | Inpatient | Pus               | HA                | t037            | III                 | ND     |
| 29             | Male             | 54                    | Inpatient | Urine             | NA                | t037            | III                 | ND     |
| 33             | Male             | 72                    | Inpatient | Pus               | NA                | t037            | III                 | ND     |
| 37             | Female           | 27                    | Inpatient | Pus               | NA                | t037            | III                 | ND     |
| 44             | Male             | 1                     | Inpatient | Pus               | NA                | t037            | III                 | ND     |
| 45             | Female           | 45                    | Inpatient | Pus               | HA                | t037            | III                 | ND     |
| 47             | Male             | 68                    | Inpatient | Pus               | CA                | t037            | III                 | ND     |
| 48             | Male             | 1                     | Inpatient | Pus               | HA                | t037            | III                 | ND     |
| 50             | Male             | 58                    | Inpatient | Urine             | CA                | t037            | ND                  | ND     |
| 53             | Female           | 40                    | Inpatient | Pus               | NA                | t037            | III                 | ND     |
| 57             | Female           | <1 <sup>1</sup>       | Inpatient | Pus               | HA                | t037            | III                 | ND     |
| 59             | Female           | 16                    | Inpatient | Sputum            | NA                | t037            | III                 | ND     |
| 62             | Male             | 59                    | ICU       | MiniBAL           | HA                | t037            | III                 | ND     |
| 63             | Male             | 52                    | Inpatient | Pus               | HA                | t037            | III                 | ND     |
| 64             | Female           | 36                    | Inpatient | Pus               | HA                | t037            | III                 | ND     |
| 65             | Female           | 50                    | ICU       | MiniBAL           | HA                | t037            | III                 | ND     |
| 66             | Female           | 25                    | Inpatient | Pus               | HA                | t037            | III                 | ND     |
| 68             | Male             | 45                    | Inpatient | Pus               | HA                | t037            | III                 | ND     |

|     |        |     |           |          |    |        |      |         |
|-----|--------|-----|-----------|----------|----|--------|------|---------|
| 75  | Male   | 31  | Inpatient | Pus      | HA | t037   | III  | ND      |
| 76  | Male   | 15  | Inpatient | Pus      | CA | t037   | III  | ND      |
| 78  | Female | 62  | ICU       | BAL      | CA | t037   | III  | ND      |
| 79  | Female | 25  | ICU       | Blood    | HA | t037   | III  | ND      |
| 83  | Female | 55  | Inpatient | Sputum   | HA | t037   | III  | ND      |
| 90  | Male   | 52  | Inpatient | Pus      | HA | t037   | III  | ND      |
| 91  | Female | 18  | Inpatient | Tissue   | HA | t037   | III  | ND      |
| 95  | Male   | 72  | Inpatient | Pus      | CA | t037   | III  | ND      |
| 96  | Male   | 63  | Inpatient | Pus      | HA | t037   | III  | ND      |
| 97  | Male   | 33  | Inpatient | Pus      | HA | t037   | III  | ND      |
| 100 | Male   | 34  | ICU       | Pus      | HA | t037   | III  | ND      |
| 101 | Male   | 52  | Inpatient | Pus      | HA | t037   | III  | ND      |
| 102 | Female | 18  | Inpatient | Blood    | HA | t037   | III  | ND      |
| 106 | Male   | 44  | ICU       | Pus      | HA | t037   | III  | ND      |
| 107 | Male   | 12  | ICU       | BAL      | HA | t037   | III  | ND      |
| 108 | Male   | 54  | ICU       | BAL      | CA | t037   | III  | ND      |
| 19  | Female | 4   | Inpatient | Pus      | HA | t044   | IV   | ST-1502 |
| 21  | Male   | 18  | Inpatient | Blood    | HA | t044   | IV   | ND      |
| 46  | Male   | 23  | Emergency | Blood    | CA | t044   | IV   | ND      |
| 1   | Male   | 30  | ICU       | BAL      | HA | t127   | V    | ST-1    |
| 20  | Female | 25  | Inpatient | Blood    | HA | t127   | ND   | ND      |
| 51  | Male   | 60  | ICU       | Pus      | HA | t127   | IV   | ND      |
| 52  | Female | 50  | Inpatient | Pus      | NA | t127   | IV   | ND      |
| 70  | Male   | 33  | Inpatient | Blood    | HA | t127   | V    | ND      |
| 73  | Male   | 58  | ICU       | Blood    | CA | t127   | V    | ND      |
| 81  | NA     | NA  | Inpatient | Pus      | NA | t127   | V    | ND      |
| 82  | Female | 62  | Inpatient | Pus      | HA | t127   | V    | ND      |
| 103 | Male   | 24  | Inpatient | Pus      | HA | t127   | ND   | ND      |
| 17  | Female | 35  | Inpatient | Blood    | NA | t16221 | V    | ND      |
| 5   | Male   | 46  | Inpatient | Blood    | HA | t223   | IV E | ND      |
| 7   | Male   | 38  | Inpatient | Pus      | HA | t223   | IV E | ND      |
| 18  | Male   | 1.5 | Inpatient | Pus      | HA | t223   | IV E | ST-22   |
| 6   | Male   | 20  | Inpatient | Aspirate | HA | t267   | IV   | ND      |

|    |        |                 |           |          |    |       |      |         |
|----|--------|-----------------|-----------|----------|----|-------|------|---------|
| 8  | Male   | 50              | ICU       | Blood    | CA | t267  | IV   | ND      |
| 11 | Male   | 1               | Inpatient | Pus      | HA | t267  | IV   | ST-4808 |
| 35 | Female | 50              | Inpatient | Pus      | NA | t267  | V    | ND      |
| 36 | Male   | 32              | Inpatient | Blood    | NA | t267  | V    | ST-97   |
| 39 | Female | 41              | Inpatient | Aspirate | NA | t267  | IV   | ND      |
| 30 | Female | 42              | Inpatient | Blood    | NA | t304  | IV   | ST-6    |
| 31 | Male   | 54              | Inpatient | Pus      | NA | t304  | III  | ST-239  |
| 2  | Male   | 35              | Inpatient | Blood    | CA | t416  | IV   | ST-80   |
| 28 | Female | 25              | ICU       | MiniBAL  | NA | t688  | IV E | ST-5    |
| 74 | Female | 31              | Inpatient | Pus      | CA | t688  | ND   | ND      |
| 80 | Female | 62              | Inpatient | Pus      | HA | t688  | ND   | ND      |
| 84 | Male   | 20              | Inpatient | Urine    | HA | t688  | ND   | ND      |
| 32 | Male   | <1 <sup>2</sup> | Inpatient | Pus      | NA | t6978 | IV E | ST-22   |
| 54 | Male   | 30              | Inpatient | Urine    | HA | t786  | ND   | ND      |

<sup>1</sup> 9 months, <sup>2</sup> 6 months.

NA: Not available, ICU: Intensive care unit, BAL: Bronchoalveolar lavage, HA: Hospital acquired, CA: Community acquired, ND: Not determined.
